# Supplementary material
Source: MDPI journal article supplement (https://www.mdpi.com/2071-1050/11/23/6575)
Supplement: s1 [file s1]

Archive with 2 entries (2 files):
- Supplementary file 1.pdf
- Supplementary file 2.pdf
