# Supplementary material
Source: MDPI journal article supplement (https://www.mdpi.com/2071-1050/11/23/6575)
Supplement: s1 [file s1 › Supplementary file 1.pdf]

## **Pubmed**

1. (((((((("Carbon footprint\*" OR "Water footprint\*" OR "Environment\*" OR "Voluntary sustainability standard\*" OR "low-carbon" OR "Organic" OR "Biodiversity" OR "Green label\*" OR "Palm Oil free" OR "Environment\* protection" OR "Conservation" OR "Green" OR "Social\* responsibl\*" OR "Social\*" OR "Sustainab\*" OR "Fair trade" OR "Animal welfare" OR "Marine Stewardship")))) OR sustainability, program[MeSH Terms])) AND (((("Label\*" OR "Claim\*" OR "Packet\*" OR "Packag\*" OR "label?ing" OR "Certificat\*" OR "awareness" OR "Standard\*" OR "signal\*")) OR ((food labelling[MeSH Terms]) OR labelling, food[MeSH Terms])) AND ((("Food\*" OR "Nutrit\*" OR "Diet\*" OR "Sustainable diet\*" OR "Health claim\*")) AND (((("Consumer\*" OR "Shopper\*" OR "Buyer\*" OR "Willingness-to-pay" OR "Decision-making" OR "Point-of-purchase" OR "Purchas\* decision\*" OR "Choice\*")) OR consumer preference[MeSH Terms]) OR consumer preferences[MeSH Terms]) OR consumer health information[MeSH Terms]))
2. (((("Eco-label\*" OR "ecolabel\*" OR "Carbon-label\*" OR "Ethical label\*")) AND (((("Consumer\*" OR "Shopper\*" OR "Buyer\*" OR "Willingness-to-pay" OR "Decision-making" OR "Point-of-purchase" OR "Purchas\* decision\*" OR "Choice\*")) OR consumer preference[MeSH Terms]) OR consumer preferences[MeSH Terms]) OR consumer health information[MeSH Terms])) AND ((("Food\*" OR "Nutrit\*" OR "Diet\*" OR "Sustainable diet\*" OR "Health claim\*"))

## **GreenFILE**

1. "Carbon footprint\*" OR "Water footprint\*" OR "Environment\*" OR "Voluntary sustainability standards" OR "low-carbon" OR "Organic" OR "Biodiversity" OR "Green label\*" OR "Palm Oil free" OR "Environment\* protection" OR "Conservation" OR "Green" OR "Social\* responsibl\*" OR "Social\*" OR "Sustainab\*" OR "Fair trade" OR "Animal welfare" OR "Marine Stewardship"
2. (DE "SUSTAINABILITY" OR DE "SUSTAINABLE communities") AND (DE "SUSTAINABLE agriculture" OR DE "BIODYNAMIC agriculture" OR DE "SUSTAINABLE aquaculture" OR DE "SUSTAINABLE forestry" OR DE "SUSTAINABLE horticulture" OR DE "SUSTAINABLE agriculture & the environment" OR DE "SUSTAINABLE aquaculture" OR DE "SUSTAINABLE communities" OR DE "SUSTAINABLE fisheries" OR DE "SUSTAINABLE forestry")
3. S1 or S2
4. "Label\*" OR "Claim\*" OR "Packet\*" OR "Packag\*" OR "label?ing" OR "Certificat\*" OR "awareness" OR "Standard\*" OR "signal"
5. "Food\*" OR "Nutrit\*" OR "Diet\*" OR "Sustainable diet\*" OR "Health claim"
6. DE "FOOD industry & the environment" OR DE "FOOD supply & the environment" OR DE "FOOD packaging laws" OR DE "FOOD packaging & the environment" OR DE "FOOD packaging"
7. S5 OR S6
8. "Consumer\*" OR "Shopper\*" OR "Buyer\*" OR "Willingness-to-pay" OR "Decision-making" OR "Point-of-purchase" OR "Purchas\* decision" OR "Choice"
9. S3 AND S4 AND S7 AND S8
10. "Eco-label\*" OR "ecolabel\*" OR "Carbon label\*" OR "Ethical label"
11. DE "ECO-labeling"
12. S10 OR S11
13. S7 AND S8 AND S12

## **Global Health**

1. ("Carbon footprint\*" or "Water footprint\*" or "Environment\*" or "Voluntary sustainability standard\*" or "low-carbon" or "Organic" or "Biodiversity" or "Green label\*" or "Palm Oil free" or

- "Environment\* protection" or "Conservation" or "Green" or "Social\* responsibl\*" or "Social\*" or "Sustainab\*" or "Fair trade" or "Animal welfare" or "Marine Stewardship\*")
2. exp sustainability/
  3. 1 or 2
  4. ("Label\*" or "Claim\*" or "Packet\*" or "Package\*" or "label?ing" or "Certificat\*" or "awareness" or "Standard\*" or "signal\*").
  5. labelling/ or nutrition labelling/ or quality labelling/ or standard labelling/
  6. 4 or 5
  7. ("Food\*" or "Nutrit\*" or "Diet\*" or "Sustainable diet\*" or "Health claim\*").
  8. food/ or exp food consumption/ or exp food marketing/ or exp food purchasing/ or exp food acceptability/ or exp food advertising/
  9. 7 or 8
  10. ("Consumer\*" or "Shopper\*" or "Buyer\*" or "Willingness-to-pay" or "Decision-making" or "Point-of-purchase" or "Purchas\* decision\*" or "Choice\*").
  11. exp consumers/
  12. 10 or 11
  13. 3 and 6 and 9 and 12
  14. ("Eco-label\*" or "ecolabel\*" or "Carbon-label\*" or "Ethical label\*").
  15. 9 and 12 and 14

### **PsychINFO**

1. ("Carbon footprint\*" or "Water footprint\*" or "Environment\*" or "Voluntary sustainability standard\*" or "low-carbon" or "Organic" or "Biodiversity" or "Green label\*" or "Palm Oil free" or "Environment\*" or "protection" or "Conservation" or "Green" or "Social\* responsibl\*" or "Social\*" or "Sustainab\*" or "Fair trade" or "Animal welfare" or "Marine Stewardship\*")
2. sustainable development/ or consumer ethics/ or environmental education/
3. 1 OR 2
4. ("Label\*" or "Claim\*" or "Packet\*" or "Packag\*" or "label?ing" or "Certificat\*" or "awareness" or "Standard\*" or "signal\*")
5. exp labeling/
6. 4 OR 5
7. ("Food\*" or "Nutrit\*" or "Diet\*" or "Sustainable diet\*" or "Health claim\*")
8. exp FOOD PREFERENCES/ or exp FOOD/
9. 7 OR 8
10. ("Consumer\*" or "Shopper\*" or "Buyer\*" or "Willingness-to-pay" or "Decision-making" or "Point-of-purchase" or "Purchas\* decision\*" or "Choice\*").
11. exp CONSUMER BEHAVIOR/ or exp CONSUMER ATTITUDES/ or exp CONSUMER ETHICS/ or exp CONSUMER EDUCATION/
12. 10 OR 11
13. 3 and 6 and 9 and 12
14. ("Eco-label\*" or "ecolabel\*" or "Carbon-label\*" or "Ethical label\*")
15. 8 and 12 and 14

### **Web of Science**

1. (TS=("Carbon footprint\*" OR "Water footprint\*" OR "Environment\*" OR "Voluntary sustainability standard\*" OR "low-carbon" OR "Organic" OR "Biodiversity" OR "Green label\*" OR "Palm Oil free" OR "Environment\* protection" OR "Conservation" OR "Green" OR "Social\* responsibl\*" OR "Social\*" OR "Sustainab\*" OR "Fair trade" OR "Animal welfare" OR "Marine Stewardship\*")

- OR "Sustainab\*" OR "Fair trade" OR "Animal welfare" OR "Marine Stewardship")) AND DOCUMENT TYPES: (Article)
2. (TS=("Label\*" OR "Claim\*" OR "Packet\*" OR "Packag\*" OR "label?ing" OR "Certificat\*" OR "awareness" OR "Standard\*" OR "signal\*")) AND DOCUMENT TYPES: (Article)
3. (TS=("Food\*" OR "Nutrit\*" OR "Diet\*" OR "Sustainable diet\*" OR "Health claim\*")) AND DOCUMENT TYPES: (Article)
4. (TS=("Consumer\*" OR "Shopper\*" OR "Buyer\*" OR "Willingness-to-pay" OR "Decision-making" OR "Point-of-purchase" OR "Purchas\* decision\*" OR "Choice\*")) AND DOCUMENT TYPES: (Article)
5. #4 AND #3 AND #2 AND #1
6. (TS=("Eco-label\*" OR "ecolabel\*" OR "Carbon-label\*" OR "Ethical label\*")) AND DOCUMENT TYPES: (Article)
7. #6 AND #4 AND #3

### **ABI/INFORM**

1. ab('carbon footprint\*' OR 'water footprint\*' OR 'environment\*' OR 'voluntary sustainability standard\*' OR 'low-carbon' OR 'organic' OR 'biodiversity' OR 'green label\*' OR 'palm oil free' OR 'environment\* protection' OR 'conservation' OR 'green' OR 'social\* responsib\*' OR 'social\*' OR 'sustainab\*' OR 'fair trade' OR 'animal welfare' OR 'marine stewardship')
2. ab('Label\*' OR 'Claim\*' OR 'Packet\*' OR 'Packag\*' OR 'label?ing' OR 'Certificat\*' OR 'awareness' OR 'Standard\*' OR 'signal\*')
3. ab('Food\*' OR 'Nutrit\*' OR 'Diet\*' OR 'Sustainable diet\*' OR 'Health claim\*' )  
ab('Consumer\*' OR 'Shopper\*' OR 'Buyer\*' OR 'Willingness-to-pay' OR 'Decision-making' OR 'Point-of-purchase' OR 'Purchas\* decision\*' OR 'Choice\*' )
4. S2 AND S3 AND S4 AND S5
5. ab('Eco-label\*' OR 'ecolabel\*' OR 'Carbon-label\*' OR 'Ethical label\*' )
6. S4 AND S5 AND S6
