# Supplementary material
Source: MDPI journal article supplement (https://www.mdpi.com/2071-1050/11/23/6575)
Supplement: s1 [file s1 › Supplementary file 2.pdf]

| Domain                      | Criteria                                                                                | Justification/definition                                                                                                                                                                                                               |
|-----------------------------|-----------------------------------------------------------------------------------------|----------------------------------------------------------------------------------------------------------------------------------------------------------------------------------------------------------------------------------------|
| <b>Choice Design</b>        | Choice of attributes and levels grounded in qualitative work with the target population | Attributes and levels should be comprehensible, sensible and relevant to the target population to ensure engagement with the choice task                                                                                               |
|                             | No conceptual overlap between attributes                                                | Attributes should be conceptually distinct and vary independently of each other, otherwise effects will not be independent                                                                                                             |
|                             | Inclusion of an opt-out or status quo option                                            | Choices that force participants to accept an unappealing choice are likely to lead to overestimation of preferences, and do not reflect usual shopping practice                                                                        |
| <b>Experimental design</b>  | Experimental design optimal or statistically efficient                                  | A D-efficient (or orthogonal) design is used, and a description of how the questionnaire accounted for participant comprehension(eg. through provision of pictorial cues, reducing cognitive fatigue from >16 choice sets) is included |
| <b>Conduct</b>              | Piloting among target population                                                        | Validity of choice task design and questionnaire features should be tested with participants from target population and subgroups                                                                                                      |
|                             | Target population appropriate for choice task design                                    | Preferences of target population should be sufficient to answer research objective                                                                                                                                                     |
|                             | Sampling frame representative of target population                                      | Sampling frames that exclude part of the target population may lead to bias in preference choice                                                                                                                                       |
|                             | Response rate sufficient to minimise bias                                               | >50% = meets criteria, <50% = risk of bias                                                                                                                                                                                             |
| <b>Analysis</b>             | Where calculated, any pooled analysis from different sub-groups appropriate             | Pooled analyses from very heterogeneous subgroups may mask marked differences in preferences                                                                                                                                           |
|                             | Where relevant, econometric model accounts for correlation of choices                   | As multiple observations are obtained from each participant, the econometric model should take account of panel nature of data to avoid overestimation of the differences between preferences                                          |
|                             | Relative attribute effects compared using a common metric?                              | Preferences for different attributes cannot be compared directly using parameter estimates due to confounding with the underlying utility scales.                                                                                      |
| <b>Conflict of Interest</b> | Study not industry or private scheme funded                                             | Trials should not be funded by food industry bodies related to the food products being tested, or by the certification schemes in question under examination                                                                           |
